1                    ***E. coli* translation strategies differ across nutrient conditions**

2

3

4    **Authors:** Sophia Hsin-Jung Li<sup>1</sup>, Zhiyuan Li<sup>2</sup>, Junyoung O. Park<sup>3,4</sup>, Christopher G. King<sup>5</sup>, Joshua  
5                    D. Rabinowitz<sup>3,6</sup>, Ned S. Wingreen<sup>\*1,3</sup>, and Zemer Gitai<sup>\*1</sup>

6    **Affiliations:**

7    <sup>1</sup>Department of Molecular Biology,

8    <sup>2</sup>Princeton Center for Theoretical Science,

9    <sup>3</sup>Lewis-Sigler Institute for Integrative Genomics,

10   <sup>4</sup>Department of Chemical and Biological Engineering,

11   <sup>5</sup>Department of Physics, and

12   <sup>6</sup>Department of Chemistry, Princeton University, Princeton, NJ, USA.

13

14    \*Correspondence to: [wingreen@princeton.edu](mailto:wingreen@princeton.edu), [zgitai@princeton.edu](mailto:zgitai@princeton.edu)

15

## 16 **Abstract**

17           For cells to grow faster they must increase their protein production rate. Microorganisms  
18 have traditionally been thought to accomplish this increase by producing more ribosomes to  
19 enhance protein synthesis capacity, leading to the linear relationship between ribosome level  
20 and growth rate observed under most growth conditions previously examined. Past studies have  
21 suggested that this linear relationship represents an optimal resource allocation strategy for  
22 each growth rate, independent of any specific nutrient state. Here we investigate protein  
23 production strategies in continuous cultures limited for carbon, nitrogen, and phosphate, which  
24 differentially impact substrate supply for protein versus nucleic acid metabolism. Unexpectedly,  
25 we find that at slow growth rates, *E. coli* achieves the same protein production rate using three  
26 different strategies under the three different nutrient limitations. Upon phosphate (P) limitation,  
27 translation is slow due to a particularly low abundance of ribosomes, which are RNA-rich and  
28 thus particularly costly for phosphorous-limited cells. In nitrogen (N) limitation, translation is  
29 slowed by limited glutamine and stalling at glutamine codons, resulting in slow elongation. In  
30 carbon (C) limitation, translation is slowed by accumulation of inactive ribosomes not bound to  
31 mRNA. These extra ribosomes enable rapid growth acceleration upon nutrient upshift. Thus,  
32 bacteria tune ribosome usage across different limiting nutrients to enable balanced nutrient-  
33 limited growth while also preparing for future nutrient upshifts.

## 34 **Introduction**

35           Resource allocation during growth is a fundamental challenge faced by all cells<sup>1-4</sup>. For  
36 example, with a fixed resource budget, cells must balance production of the machinery that  
37 makes proteins (ribosomes, tRNAs, translation factors) with the production of the proteins  
38 themselves. This balance is generally represented by the RNA:protein ratio (R/P ratio)<sup>5</sup>. The  
39 R/P ratio captures protein production capacity, as >95% of total RNA is devoted to translation  
40 (rRNAs and tRNAs<sup>5,6</sup>). In single-cell organisms like *E. coli*, previous studies demonstrated that

41 there is a linear relationship between R/P ratio and growth rate, with faster growth rates  
42 requiring more protein production capacity and therefore higher R/P ratios<sup>5,7,8</sup>. Production of  
43 ribosomes is costly as each contains 52 protein subunits and three large rRNAs<sup>9,10</sup>; hence, it is  
44 advantageous for the cell to saturate ribosomes with substrates. In this efficient ribosome  
45 scenario, the ribosome level should be fixed and independent of nutrient conditions for any  
46 growth rate, with the only way to increase protein synthesis rate being to increase the number of  
47 ribosomes<sup>1,5,11</sup>. One surprise for such a seemingly optimized system is that multiple studies  
48 have demonstrated that at slow growth rates *E. coli* accumulates inactive ribosomes<sup>12</sup>. There  
49 are two possible explanations for the presence of inactive ribosomes. First, it is possible that *E.*  
50 *coli* translation is constrained in such a way that it cannot function when ribosome levels drop  
51 too low<sup>12</sup>. Alternatively, *E. coli* could regulate ribosome production independently of growth rate.  
52 Here we settle this debate by showing that *E. coli* ribosome production and usage differ across  
53 nutrient conditions.

## 54 **Results**

### 55 ***Phosphate-limited cells achieve the same growth rate with fewer ribosomes than Carbon-*** 56 ***or Nitrogen-limited cells***

57 To determine the generality of the relationship between growth rate and ribosome  
58 content, we examined how the R/P ratio changes as a function of growth upon different nutrient  
59 limitations. We measured R/P ratios in *E. coli* under glucose- (C, carbon), ammonia- (N,  
60 nitrogen), and phosphate- (P, phosphorous) limitations over a range of different growth rates in  
61 chemostats (Figure 1A). Surprisingly, P-limited cells consistently exhibited lower R/P ratios than  
62 C-limited or N-limited cells, with a roughly 2-fold difference at the slowest growth rate tested (0.1  
63 h<sup>-1</sup>, Figure 1B). Measured protein levels were similar in all cells regardless of growth rate or  
64 nutrient limitation (Figure S1A-B), indicating that the changes in the R/P ratios reflect changes in  
65 ribosome availability.

66 The finding that *E. coli* can grow at the same rate with a lower R/P ratio implies that P-  
67 limited cells make the same amount of protein with fewer ribosomes, i.e. use ribosomes more  
68 efficiently. Thus, C/N-limited *E. coli* cells do not use ribosomes with optimal efficiency and their  
69 supply of “extra” ribosomes cannot be ascribed to requirements for productive translation. Since  
70 RNA accounts for two-thirds of the mass of bacterial ribosomes<sup>9,14</sup>, producing fewer ribosomes  
71 upon phosphate-limitation makes sense as a way for cells to deal with a limitation that  
72 preferentially reduces an elemental substrate needed to make RNA but not protein. This effect  
73 may be a direct consequence of low phosphate resulting in limited nucleotide pools and thus  
74 slow RNA synthesis, as deletion of phosphate sensing or storage systems, *phoB*<sup>15</sup> or *ppk*<sup>16</sup>, did  
75 not alter the R/P ratio (Figure S1C-D).

76 ***N-limited ribosomes translate slowly while C-limited cells accumulate more mRNA-free***  
77 ***ribosomes***

78 Why do C/N-limited cells accumulate so many ribosomes if P-limited cells can achieve  
79 the same protein synthesis rates with fewer ribosomes? One possibility is that the ribosomes in  
80 these cells translate slowly. We thus used a *lacZ* induction assay to compare the translation  
81 elongation rates of slow-growing C-, N-, and P-limited cells ( $0.1 \text{ h}^{-1}$ )<sup>17,18</sup>. We observed a reduced  
82 elongation rate in N-limited cells compared to C- and P-limited cells but no difference between  
83 C- and P-limited cells (Figure 1C). Thus, N-limited cells may need higher ribosome numbers to  
84 compensate for their slow translation elongation, but something else must explain the elevated  
85 ribosome numbers in C-limited cells.

86 To characterize ribosome pools we performed polysome profiling, which separates  
87 ribosome species using a sucrose gradient<sup>19</sup>. Regardless of the growth condition, all cells  
88 exhibited similar fractional pools of dissociated 30S and 50S subunits (Figure 1D). In contrast,  
89 the fraction of 70S monosomes was significantly larger in C/N-limited cells than in P-limited cells  
90 (Figure 1D). Since growth rate is proportional to protein synthesis rate, growth rate can be

91 estimated by the product of the number of active ribosomes and the translation elongation rate.  
92 However, using the assumption that all 70S monosomes are active yielded very different growth  
93 rate estimates for C-, N-, and P-limited cells (Figure 1F and SI), which is inconsistent with the  
94 fact that these cells are growing at the same rate and have the same protein content. This  
95 inconsistency suggested that a fraction of the 70S ribosomes may not be active.

96 The mass of a single mRNA is small relative to the mass of a ribosome, such that 70S  
97 monosomes could represent either mRNAs with only one ribosome per transcript or inactive  
98 “free” ribosomes that are not associated with an mRNA. To distinguish free and mRNA-bound  
99 70S monosomes, we utilized their differential sensitivity to high potassium levels (170 mM)<sup>20</sup>.  
100 High potassium causes free ribosomes to shift to a lower density but does not shift the density  
101 of mRNA-bound monosomes<sup>20</sup>. We thus designed a high-resolution “free-ribosome profiling”  
102 method to resolve this density shift (Figure S2). As controls, we confirmed that our assay  
103 detects the potassium-dependent shift of 70S monosomes induced by puromycin (Figure S2),  
104 which releases elongating ribosomes from their associated mRNAs<sup>21</sup>. There was no potassium-  
105 dependent shift detected in fast-growing cells that lack free ribosomes (Figure S2).

106 By combining traditional and free-ribosome polysome profiling, we quantified the relative  
107 fractions of all ribosome species in slow-growing C-, N-, and P-limited *E. coli*. The fraction of  
108 free monosomes was roughly 3-fold greater in the C-limited cells than in the P-limited cells,  
109 while the fraction of mRNA-bound monosomes remained relatively constant across nutrient  
110 limitations (Figure 1E). The accumulation of free 70S monosomes in C- and N-limited cells  
111 appears to be independent of a previously-described RaiA-dependent mechanism for ribosome  
112 storage as deletion of *raiA* had no impact on R/P ratios or polysome profiles (Figure S3).  
113 Importantly, revising our protein synthesis rate estimates to account for the fraction of inactive  
114 70S monosomes yielded similar values for all cells, regardless of nutrient limitation (Figure 1F).  
115 These results both validate our experimental measurements and suggest that in different

116 nutrient states, *E. coli* differentially tune ribosome number, translation rate, and active fraction to  
117 produce proteins at the same rates (Figure 2A).

118 ***Quantitative modeling describes three different strategies of ribosome dynamics to***  
119 ***achieve the same protein production rate***

120 To better understand nutrient-dependent ribosome dynamics, we probed translation in  
121 slow-growing C-, N-, and P-limited cells by ribosome profiling. Analysis of ribosome densities as  
122 a function of distance from the start and stop codons revealed higher ribosome occupancy near  
123 the start codon (Figure 2B). Ribosome density thereafter was similar, with no decrease in  
124 ribosome density between the first and second halves of genes (Figures 2B and S4A),  
125 suggesting that there is little to no aborted translation after the first few codons. We quantified  
126 ribosome dynamics by building a simple macroscopic model (Figure 2C, S4B-E and details in  
127 SI). In this model, unbound ribosomes ( $R_u$ ) can bind to an mRNA with a free ribosomal binding  
128 site (with rate constant  $k_f$ ) to become initiating ribosomes ( $R_i$ ). The initiating ribosomes can  
129 proceed to elongation (with rate constant  $k_p$ ) to become working ribosomes ( $R_w$ ), or can abort  
130 translation (with rate constant  $k_r$ ). Working ribosomes elongate to finish translation and become  
131 unbound (with rate constant  $k_{el}/N_{aa}$ ), where  $N_{aa}$  is the length of an average protein in amino  
132 acids. We defined the fraction of ribosomes bound to the first 10 codons as initiating ribosomes  
133 since the ribosome footprint size is  $\sim 10$  codons<sup>22,23</sup>. To validate our model we used it to  
134 calculate elongation rates, which closely agreed with those we measured experimentally (Figure  
135 S5A).

136 Analysis of our model indicated that the system can be characterized by two main  
137 dimensionless parameters: the "relative proceeding rate", defined as the ratio between the rate  
138 of ribosomes proceeding from initiation to elongation ( $k_p, s^{-1}$ ) and the rate of elongation ( $k_{el}/N_{aa},$   
139  $s^{-1}$ ); and the "saturation parameter" ( $R_t/(K_m+R_t)$ ), reflecting the degree of saturation of ribosome  
140 binding sites on mRNAs, where  $R_t$  is the total ribosome number and  $K_m = (k_r + k_p)/k_f$  (Figures

141 2D-E and S5B-C). Fitting the measured ribosome densities, translation elongation rates, and  
142 pool sizes of ribosome species to the macroscopic model revealed that P-limited cells have the  
143 highest relative proceeding rate while C-limited cells have the lowest saturation parameter, and  
144 N-limited cells have intermediate values for both parameters (Figures 2D-E and S5B-H). Thus,  
145 C-, N-, and P-limited cells produce proteins at the same rate using three different strategies: P-  
146 limited cells have few ribosomes that are mostly active and elongate rapidly, N-limited cells  
147 have more ribosomes but fewer are active and they elongate slowly, and C-limited cells have  
148 many ribosomes, which elongate rapidly, but even fewer are bound to mRNA (Figure 2F and  
149 S5I).

#### 150 ***N-limited ribosomal regulation is mediated by RelA, the ppGpp alarmone synthase***

151 Insight into the molecular basis of nutrient-specific ribosome regulation came from  
152 analysis of the codon occupancies in our ribosome profiling data. Codon-specific ribosome  
153 stalling leads to increased codon occupancy and is a hallmark of insufficient pools of the  
154 corresponding charged tRNAs. P-limited cells exhibited no elevated codon frequencies,  
155 consistent with these cells' efficient ribosome usage (Figure 3A). In contrast, both C- and N-  
156 limited cells exhibited significant codon-specific stalling. Under N-limitation, ribosomes stalled at  
157 both of the two glutamine-encoding codons, which together account for 4.4% of all predicted  
158 ORF codons in *E. coli*. This result is consistent with previous studies indicating that glutamine is  
159 the most strongly-depleted amino acid pool upon N-limitation and serves as an intracellular  
160 sensor for extracellular nitrogen levels<sup>24-26</sup>. Upon C-limitation, we observed elevated occupancy  
161 of the Leu-CUA codon, which was surprising as there is no known intracellular carbon sensor  
162 that controls translation. *E. coli* has six leucine codons decoded by five leucine tRNA  
163 species<sup>27,28</sup>. Leu-CUA is the rarest Leu codon, accounting for only 0.4% of all predicted ORF  
164 codons.

165 In addition to clarifying the link between metabolism and translation for N-limitation, the  
166 observation that ribosomes stall at specific codons upon C/N-limitation suggested a molecular  
167 mechanism for nutrient-specific translation regulation (Figure 3A). In bacteria, insufficient  
168 charged tRNA pools activate the stringent response to induce accumulation of the cellular  
169 alarmone, ppGpp<sup>30,31</sup>. ppGpp is known to regulate rRNA transcription *in vivo*. Its role in  
170 translation is less well-understood but ppGpp has been shown *in vitro* to inhibit translation  
171 factors such as EF-Tu and IF2 by competing with GTP<sup>32,33</sup>. To test how ppGpp accumulation  
172 might affect translation *in vivo*, we induced ppGpp synthesis by treating batch-grown *E. coli* with  
173 serine hydroxamate (SHX). SHX is a serine analog that competitively inhibits serine tRNA  
174 synthetase to yield uncharged serine-tRNA and thereby activate the RelA ppGpp synthase<sup>34</sup>.  
175 SHX treatment increased the pool of mRNA-free 70S monosomes, and this effect was  
176 completely dependent on *relA* (Figures S6A-B). Thus, inducing ppGpp by activating RelA alters  
177 translation by increasing the fraction of inactive free 70S ribosomes.

178 RelA is primarily required for the accumulation of ppGpp upon N-limitation but not C-  
179 limitation<sup>31</sup>. Consistently, deletion of *relA* had little impact on the accumulation of free ribosomes  
180 upon C-limitation, but significantly reduced free ribosome pools upon N-limitation to levels  
181 similar to those observed upon P-limitation (Figures 3B and S6C). We could not probe the role  
182 of ppGpp in C-limited ribosome accumulation because unlike N-limitation, C-limitation elevates  
183 ppGpp through *spoT*, which is essential<sup>35</sup>. N-limited  $\Delta relA$  cells also contained more polysomes  
184 than wild type (Figure 3B), suggesting that these cells had a higher fraction of elongating  
185 ribosomes. This result was initially confusing because the wild type and  $\Delta relA$  N-limited cells  
186 were grown at the same growth rate and maintained the same R/P ratio (Figure S6D). We thus  
187 measured the rate of translation elongation and found that while N-limited  $\Delta relA$  cells have  
188 higher fractions of translating ribosomes, their ribosomes elongate more slowly (Figure 3C),  
189 resulting in the same rate of protein production as wild type.



190 To understand how RelA influences ribosome dynamics we performed ribosome  
191 profiling. N-limited  $\Delta relA$  cells exhibited more pronounced ribosome stalling at both glutamine  
192 codons than wild type N-limited cells, while  $relA$  deletion had no effect on P- or C-limited cells  
193 (Figures 3D and S7). Fitting the  $\Delta relA$  cells measurements to our ribosome dynamics model  
194 revealed that  $\Delta relA$  cells specifically increase the relative proceeding rate under N-limitation, but  
195 display no effect on relative proceeding rate under P- or C-limitation and no effect on the  
196 saturation parameter in any condition (Figures 3E and S5B-C). These results suggest that,  
197 consistent with its known effects on IF-2 *in vitro*, in N-limited cells RelA functions to restrict the  
198 transition from translational initiation to elongation. Thus, in the absence of RelA, more  
199 ribosomes attempt to elongate, which exacerbates the depletion of charged tRNA pools, leading  
200 to increased stalling and a slower translational elongation rate.

### 201 ***Extra ribosomes may facilitate growth acceleration upon nutrient upshift***

202 While cells can modulate different aspects of ribosome dynamics to achieve the same  
203 protein production rate, what benefits might be served by the inefficient translation system used  
204 by C-limited cells where many ribosomes are inactive? Since free ribosomes accumulate the  
205 most at the slowest growth rates, we hypothesized that our findings could reflect a trade-off  
206 between steady-state growth rate and the ability to respond to a fluctuating environment. Such  
207 transitions could include rapidly and safely slowing growth when nutrients become depleted and  
208 rapidly increasing growth rate when nutrients are replenished. In this scenario, cells may benefit  
209 more by optimizing their ability to rapidly utilize new nutrients, for example to outcompete their  
210 neighbors or maximally utilize a transient pulse of nutrients, than by optimizing steady-state  
211 growth rate when nutrient levels are low.

212 We built a mathematical model of cellular resource allocation to predict the growth  
213 dynamics upon upshift. This model supported the hypothesis that the larger free ribosome pools  
214 of C/N-limited cells should enable them to increase their growth rates more quickly than P-

215 limited cells upon nutrient upshift (Figures 4A, S8 and details in SI)<sup>4,36</sup>. We experimentally tested  
216 this prediction by measuring the growth rates of slow-growing ( $0.1 \text{ h}^{-1}$ ) *E. coli* immediately after  
217 being shifted to rich media (LB + 0.4% glucose)<sup>37</sup>. As predicted, C/N-limited cells increased  
218 their growth rates significantly faster than P-limited cells (Figure 4B). Thus, the distinct  
219 translation strategies employed under different nutrient conditions may represent nutrient-  
220 specific adaptations, with P-limited cells optimizing for current steady-state growth under slow  
221 growth conditions, and C- and N-limited cells favoring the ability to rapidly recover growth  
222 (Figure 4C).

## 223 Discussion

224 In previous studies, *E. coli* were found to vary R/P ratio with growth rate independently of  
225 the specific nutrient limitation used to produce a given growth rate<sup>5,8</sup>. Meanwhile, transcriptional  
226 analysis in *Saccharomyces cerevisiae* suggested that the primary determinant of the response  
227 to a wide range of stresses was the cellular growth rate rather than the specific stressor<sup>38</sup>.  
228 Together, these studies suggested that the primary regulator of microbial physiology is growth  
229 rate. However, our findings demonstrate that at the same growth rate, *E. coli* exhibit significantly  
230 different translation strategies across nutrient limitations; at the lowest growth rate tested, P-  
231 limited cells produced the same amount of protein with roughly half as many ribosomes as C/N-  
232 limited cells. P-limited cells also exhibited smaller inactive 70S monosome pools and higher  
233 relative proceeding rates than C/N-limited cells. Furthermore, while C/N-limited cells have  
234 similar ribosome numbers, they also display differences in free ribosome pools, translational  
235 elongation rates, and sensitivity to the loss of the ppGpp synthase RelA. Thus, our results  
236 suggest that the extra ribosomes of C/N-limited cells do not reflect essential constraints, but  
237 rather reflect a selectively beneficial adaptation.

238 Our findings also implicate ppGpp as a key mediator of ribosome activity that specifically  
239 modulates the transition from translation initiation to elongation. ppGpp is a well-characterized

240 cellular alarmone that senses translational activity and inhibits rRNA transcription<sup>31,39</sup>. However,  
241 ppGpp can competitively inhibit GTP-dependent enzymes, including the translation initiation  
242 factor IF-2 that is required for the transition to elongation<sup>40</sup>. Our data thus provide *in vivo* support  
243 for a previous *in vitro* study demonstrating that ppGpp inhibits IF-2 function<sup>33</sup>. Since ppGpp can  
244 also affect other GTP-binding proteins involved in translation<sup>32,41</sup>, future studies on bacterial  
245 translation will confirm exactly how ppGpp interferes with ribosome function.

246 In native environments such as the mammalian gut, bacteria such as *E. coli* are faced  
247 with feast and famine cycles induced by feeding cycles<sup>42</sup>. Here we show that the linear  
248 relationship between R/P ratio and growth rate in *E. coli* does not reflect the optimization of  
249 steady-state growth rate but, instead, reflects the ability of cells with higher inactive ribosome  
250 pools to rapidly accelerate growth upon nutrient repletion. These findings suggest that *E. coli*  
251 may improve their fitness by sacrificing their maximal growth rate in nutrient-poor periods in  
252 return for the ability to respond to a changing environment, including rapidly accelerating growth  
253 in nutrient-rich periods. Our macroscopic model highlights how cells can tune total ribosome  
254 number, the fraction of working ribosomes, and the rate of translational elongation to achieve  
255 the same total protein production rate while balancing other constraints such as reduced amino  
256 acid availability or the need to rapidly accelerate growth. Future studies will address the  
257 consequences of adaptation strategies in dynamic conditions, for example the generality of  
258 bacteria optimizing growth rate transitions at the expense of steady-state growth<sup>43</sup>, but this  
259 strategy could explain recent reports of the sub-optimality of protein allocation for *E. coli* in the  
260 presence of poor carbon sources<sup>44</sup>, as well as the sub-optimal expression levels of essential  
261 genes in *B. subtilis*<sup>45</sup>.

262

### 263 **Author Contributions**

264 S.H.L., J.O.P., J.D.R., N.S.W, and Z.G. designed the experiments. S.H.L., J.O.P., and C.K.  
265 performed experiments. Z.L. and N.S.W. constructed the mathematical models. S.H.L.

266 conducted computational analysis of sequencing data. S.H.L, Z.L., N.S.W, and Z.G. wrote the  
267 paper with assistance from J.D.R.

268

## 269 **Acknowledgments:**

270 We thank the members of the Gitai, Wingreen, and Rabinowitz labs for helpful discussions. We  
271 thank Gene-Wei Li for his support for the ribosome profiling experiments. We thank the  
272 Microarray Core Facility at the Lewis-Sigler Institute (Daniel Sanchez, Jennifer M. Miller, Jessica  
273 Wiggins, and Wei Wang) for RNA-Seq sample processing and sequencing and the Princeton  
274 Proteomics Core Facility (Henry Shwe and Tharan Srikumar) for ribosome profiling sample  
275 processing. Lance Parsons provided helpful technical support for bioinformatics analysis of the  
276 sequencing data. We thank the Botstein lab, particularly Sandy Silverman, for chemostat  
277 operation support and all former members for discussions relating to microbial growth.

278

279 The ribosome sequencing data that support the findings of this paper will be deposited in  
280 GenBank with the accession code at publication.

281 This work was supported by grants from the NIH (DP1AI124669 and R01GM082938).

282

## 283 **References and Notes:**

284

- 285 1. You, C. *et al.* Coordination of bacterial proteome with metabolism by cyclic AMP  
286 signalling. **500**, 301–306 (2013).
- 287 2. Li, G.-W., Burkhardt, D., Gross, C. & Weissman, J. S. Quantifying absolute protein  
288 synthesis rates reveals principles underlying allocation of cellular resources. *Cell*  
289 **157**, 624–635 (2014).
- 290 3. Scott, M., Klumpp, S., Mateescu, E. M. & Hwa, T. Emergence of robust growth laws  
291 from optimal regulation of ribosome synthesis. *Mol. Syst. Biol.* **10**, 747–747 (2014).
- 292 4. Giordano, N., Mairet, F., Gouzé, J.-L., Geiselman, J. & de Jong, H. Dynamical  
293 Allocation of Cellular Resources as an Optimal Control Problem: Novel Insights into  
294 Microbial Growth Strategies. *PLoS Comput. Biol.* **12**, e1004802 (2016).
- 295 5. Bremer, H. & Dennis, P. P. Modulation of Chemical Composition and Other  
296 Parameters of the Cell at Different Exponential Growth Rates. *EcoSal* 1–56 (2012).
- 297 6. Baracchini, E. & Bremer, H. Determination of synthesis rate and lifetime of bacterial  
298 mRNAs. *Anal. Biochem.* **167**, 245–260 (1987).
- 299 7. Schaechter, M., Maaløe, O. & Kjeldgaard, N. O. Dependency on Medium and  
300 Temperature of Cell Size and Chemical Composition during Balanced Growth of  
301 *Salmonella typhimurium*. *Microbiology* **19**, 592–606 (1958).
- 302 8. Scott, M., Gunderson, C. W., Mateescu, E. M., Zhang, Z. & Hwa, T.  
303 Interdependence of cell growth and gene expression: origins and consequences.  
304 *Science* **330**, 1099–1102 (2010).
- 305 9. Yamamoto, T., Izumi, S. & Gekko, K. Mass spectrometry of hydrogen/deuterium  
306 exchange in 70S ribosomal proteins from *E. coli*. *FEBS Lett.* **580**, 3638–3642  
307 (2006).
- 308 10. Nomura, M. & Gourse, R. Regulation of the synthesis of ribosomes and ribosomal  
309 components. *Annual review of ...* (1984).
- 310 11. Maaløe, O. & Kjeldgaard, N. O. *Control of Macromolecular Synthesis, WA*  
311 *Benjamin*. (Inc., 1966).

- 312 12. Dai, X. *et al.* Reduction of translating ribosomes enables Escherichia coli to  
313 maintain elongation rates during slow growth. *Nat Microbiol* **2**, 16231 (2016).
- 314 13. Klumpp, S., Scott, M., Pedersen, S. & Hwa, T. Molecular crowding limits translation  
315 and cell growth. *Proc. Natl. Acad. Sci. U.S.A.* **110**, 16754–16759 (2013).
- 316 14. Lewin, B. *Genes VIII*. (Pearson education, Inc, 2003).
- 317 15. Wanner, B. L. Gene regulation by phosphate in enteric bacteria. *Journal of Cellular*  
318 *Biochemistry* **51**, 47–54 (1993).
- 319 16. Ahn, K. & Kornberg, A. Polyphosphate kinase from Escherichia coli. Purification  
320 and demonstration of a phosphoenzyme intermediate. *J. Biol. Chem.* **265**, 11734–  
321 11739 (1990).
- 322 17. Schleif, R., Hess, W., Finkelstein, S. & Ellis, D. Induction kinetics of the L-arabinose  
323 operon of Escherichia coli. *J. Bacteriol.* **115**, 9–14 (1973).
- 324 18. Dalbow, D. G. & Young, R. Synthesis time of  $\beta$ -galactosidase in Escherichia coli B/r  
325 as a function of growth rate. *Biochemical Journal* **150**, 13–20 (1975).
- 326 19. Qin, D. & Fredrick, K. Analysis of polysomes from bacteria. *Meth. Enzymol.* **530**,  
327 159–172 (2013).
- 328 20. Beller, R. J. & Lubsen, N. H. Effect of polypeptide chain length on dissociation of  
329 ribosomal complexes. *Biochemistry* **11**, 3271–3276 (1972).
- 330 21. Nathans, D. Puromycin inhibition of protein synthesis: incorporation of puromycin  
331 into peptide chains. *Proc. Natl. Acad. Sci. U.S.A.* **51**, 585–592 (1964).
- 332 22. Steitz, J. A. Polypeptide Chain Initiation: Nucleotide Sequences of the Three  
333 Ribosomal Binding Sites in Bacteriophage R17 RNA. **224**, 957–964 (1969).
- 334 23. Ingolia, N. T., Ghaemmaghami, S., Newman, J. R. S. & Weissman, J. S. Genome-  
335 wide analysis in vivo of translation with nucleotide resolution using ribosome  
336 profiling. *Science* **324**, 218–223 (2009).
- 337 24. Doucette, C. D., Schwab, D. J., Wingreen, N. S. & Rabinowitz, J. D.  $\alpha$ -Ketoglutarate  
338 coordinates carbon and nitrogen utilization via enzyme I inhibition. *Nature Chemical*  
339 *Biology* **7**, 894–901 (2011).
- 340 25. Yuan, J. *et al.* Metabolomics-driven quantitative analysis of ammonia assimilation in  
341 E. coli. *Mol. Syst. Biol.* **5**, 302 (2009).
- 342 26. Ikeda, T. P., Shauger, A. E. & Kustu, S. Salmonella typhimurium Apparently  
343 Perceives External Nitrogen Limitation as Internal Glutamine Limitation. *Journal of*  
344 *Molecular Biology* **259**, 589–607 (1996).
- 345 27. Subramaniam, A. R., Pan, T. & Cluzel, P. Environmental perturbations lift the  
346 degeneracy of the genetic code to regulate protein levels in bacteria. *Proc. Natl.*  
347 *Acad. Sci. U.S.A.* **110**, 2419–2424 (2013).
- 348 28. Sørensen, M. A. *et al.* Over Expression of a tRNA<sup>Leu</sup> Isoacceptor Changes  
349 Charging Pattern of Leucine tRNAs and Reveals New Codon Reading. *Journal of*  
350 *Molecular Biology* **354**, 16–24 (2005).
- 351 29. Elf, J., Nilsson, D., Tenson, T. & Ehrenberg, M. Selective charging of tRNA  
352 isoacceptors explains patterns of codon usage. *Science* **300**, 1718–1722 (2003).
- 353 30. Haurlyiuk, V., Atkinson, G. C., Murakami, K. S., Tenson, T. & Gerdes, K. Recent  
354 functional insights into the role of (p)ppGpp in bacterial physiology. *Nat Rev Micro*  
355 **13**, 298–309 (2015).
- 356 31. Potrykus, K. & Cashel, M. (p)ppGpp: Still Magical? \*. *Annu. Rev. Microbiol.* **62**, 35–  
357 51 (2008).
- 358 32. Mitkevich, V. A. *et al.* Thermodynamic characterization of ppGpp binding to EF-G or  
359 IF2 and of initiator tRNA binding to free IF2 in the presence of GDP, GTP, or  
360 ppGpp. *Journal of Molecular Biology* **402**, 838–846 (2010).
- 361 33. Milon, P. *et al.* The nucleotide-binding site of bacterial translation initiation factor 2  
362 (IF2) as a metabolic sensor. *Proc. Natl. Acad. Sci. U.S.A.* **103**, 13962–13967

- 363 (2006).  
364 34. Jiang, M., Sullivan, S. M., Wout, P. K. & Maddock, J. R. G-protein control of the  
365 ribosome-associated stress response protein SpoT. *J. Bacteriol.* **189**, 6140–6147  
366 (2007).  
367 35. Gentry, D. R. & Cashel, M. Mutational analysis of the Escherichia coli spoT gene  
368 identifies distinct but overlapping regions involved in ppGpp synthesis and  
369 degradation. *Mol. Microbiol.* **19**, 1373–1384 (1996).  
370 36. Pavlov, M. Y. & Ehrenberg, M. Optimal control of gene expression for fast proteome  
371 adaptation to environmental change. *Proc. Natl. Acad. Sci. U.S.A.* **110**, 20527–  
372 20532 (2013).  
373 37. Kjeldgaard, N. O., Maaløe, O. & Schaechter, M. The Transition Between Different  
374 Physiological States During Balanced Growth of Salmonella typhimurium.  
375 *Microbiology* **19**, 607–616 (1958).  
376 38. Brauer, M. J. *et al.* Coordination of growth rate, cell cycle, stress response, and  
377 metabolic activity in yeast. *Mol. Biol. Cell* **19**, 352–367 (2008).  
378 39. Paul, B. J., Ross, W., Gaal, T. & Gourse, R. L. rRNA Transcription in Escherichia  
379 coli. *Annu. Rev. Genet.* **38**, 749–770 (2004).  
380 40. Laursen, B. S., Sørensen, H. P., Mortensen, K. K. & Sperling-Petersen, H. U.  
381 Initiation of protein synthesis in bacteria. *Microbiology and Molecular Biology*  
382 *Reviews* **69**, 101–123 (2005).  
383 41. Rojas, A.-M., Ehrenberg, M. N., Andersson, S. G. E. & Kurland, C. G. ppGpp  
384 inhibition of elongation factors Tu, G and Ts during polypeptide synthesis. *Mol.*  
385 *Gen. Genet.* **197**, 36–45 (1984).  
386 42. Zarrinpar, A., Chaix, A., Yooseph, S. & Panda, S. Diet and Feeding Pattern Affect  
387 the Diurnal Dynamics of the Gut Microbiome. *Cell Metabolism* **20**, 1006–1017  
388 (2014).  
389 43. Fischer, E. & Sauer, U. Large-scale in vivo flux analysis shows rigidity and  
390 suboptimal performance of Bacillus subtilis metabolism. *Nat. Genet.* **37**, 636–640  
391 (2005).  
392 44. Towbin, B. D. *et al.* Optimality and sub-optimality in a bacterial growth law. *Nat*  
393 *Commun* **8**, 14123 (2017).  
394 45. Peters, J. M. *et al.* A Comprehensive, CRISPR-based Functional Analysis of  
395 Essential Genes in Bacteria. *Cell* **165**, 1493–1506 (2016).  
396 46. Baba, T. *et al.* Construction of Escherichia coli K-12 in-frame, single-gene knockout  
397 mutants: the Keio collection. *Mol. Syst. Biol.* **2**, 2006.0008 (2006).  
398 47. Zhu, M., Dai, X. & Wang, Y.-P. Real time determination of bacterial in vivo ribosome  
399 translation elongation speed based on LacZα complementation system. *Nucleic*  
400 *Acids Res.* gkw698 (2016). doi:10.1093/nar/gkw698  
401 48. Dunn, J. G. & Weissman, J. S. Plastid: nucleotide-resolution analysis of next-  
402 generation sequencing and genomics data. *BMC Genomics* **17**, 958 (2016).  
403 49. Woolstenhulme, C. J., Guydosh, N. R., Green, R. & Buskirk, A. R. High-precision  
404 analysis of translational pausing by ribosome profiling in bacteria lacking EFP. *Cell*  
405 *Rep* **11**, 13–21 (2015).  
406

## 407 **Materials and Methods**

### 408 Cell strains and growth conditions

409 *Escherichia coli* strain NCM3722 was grown in batch or continuous cultures. To achieve  
410 different growth rates, different carbon or nitrogen sources were provided in batch culture,  
411 whereas dilution rates ranging from 0.1 h<sup>-1</sup> to 0.7 h<sup>-1</sup> were used in continuous (chemostat)

412 cultures. The chemostat (Sixfors, HT) volume was 300mL with oxygen and pH probes to  
413 monitor the culture. pH was maintained at 7.2 +/- 0.1 and the aeration rate was set at 4.5 l/h. 40  
414 mM MOPS media (M2120, Teknova) was used with glucose (0.4%, Sigma G8270), ammonia  
415 (9.5 mM NH<sub>4</sub>Cl, Sigma A9434) and phosphate (1.32 mM K<sub>2</sub>HPO<sub>4</sub>, Sigma P3786) added  
416 separately. For carbon- and nitrogen- limiting media, glucose and ammonia concentrations were  
417 reduced by 5-fold (0.08% and 1.9mM respectively). Phosphorus-limiting medium contains 0.132  
418 mM K<sub>2</sub>HPO<sub>4</sub>. *ΔrelA* mutant was generated by P1 transduction from the KEIO collection<sup>46</sup> into  
419 *Escherichia coli* strain NCM3722

420

#### 421 Nutrient upshift growth measurement

422 Cells from chemostats were mixed with 4X volumes of fresh pre-warmed media and grown  
423 in flasks in a 37°C water bath. Cell growth was monitored every 5 minutes by checking  
424 absorbance at 600nm in a quartz cuvette (Starna, 16.160-Q-10/Z8.5) using a  
425 spectrophotometer (GENESYS™ 20, Thermo Scientific). The LB media (244610, BD) used for  
426 upshift was supplemented with 0.4% glucose.

427

#### 428 Total RNA measurement

429 The method for RNA measurement was adapted from You *et al.*<sup>1</sup>. 1.5 mL of cultures were  
430 pelleted by centrifugation for 1 min at 13,000 X g. The pellet was frozen on dry ice and the  
431 supernatant was taken to measure absorbance at 600 nm for cell loss. The pellet was then  
432 washed twice with 0.6M HClO<sub>4</sub> and digested with 0.3M KOH for 1 hour at 37°C. The solution  
433 was then precipitated with 3M HClO<sub>4</sub> and the supernatant was collected. The pellet was re-  
434 extracted again with 0.5M HClO<sub>4</sub>. The supernatants were combined and absorbance measured  
435 at 260nm using NanoDrop (ND-1000, NanoDrop). Total RNA concentration was determined by  
436 multiplying the A260 absorbance with 31 (μg RNA/mL) as the extinction coefficient.

437

#### 438 Total protein measurement

439 The method for protein measurement is adapted from You *et al.*<sup>1</sup>. 1.5 mL of cell cultures were  
440 pelleted by centrifugation for 1 min at 13,000 X g. Cells were washed with 1 mL MOPS buffer  
441 once, re-suspended in 200 μL water and left on dry ice. All the supernatant was collected and  
442 OD600 was measured for cell loss. To measure the protein content, samples were thawed,  
443 100μL 3M NaOH were added, and the sample was heated for 5 min at 98°C. The samples were  
444 cooled down to RT for 5 min before 300μL 0.1% CuSO<sub>4</sub> were added for biuret assay. The  
445 samples were incubated at RT for 5 min and centrifuged at 13,000 X g for 1 min. The  
446 supernatant was collected and absorbance was measured at 555nm for a 200μL sample  
447 volume in a microplate reader (Synergy HT, BioTek) with software Gen 5.0. Proper dilution of  
448 albumin (23209, Thermo) with known concentrations was used to infer the total protein  
449 concentration in the cell.

450

#### 451 Polysome profiling and quantification of ribosome fraction

452 200mL of cells were collected from cultures by filtration through 90mm cellulose acetate  
453 membranes with a 0.2 μm pore size (CA029025, Strelitech) at 37°C, scratched with a clean and  
454 pre-warmed stainless steel spatula, and snap-frozen in liquid nitrogen. The whole filtration  
455 procedure did not take more than 2 minutes in order to maintain the original physiological state.  
456 Cell pellets were mixed with 650μL lysis buffer frozen nuggets (20mM Tris-HCl pH 8.0, 10mM  
457 MgCl<sub>2</sub>, 100mM NH<sub>4</sub>Cl, 0.4% Triton X-100, 0.1% NP-40, 1 mM Chloramphenicol, 100 U/mL  
458 RNase-free DNase I (04716728001 Roche)) in a pre-chilled 10mL jar (014620331, Retsch).  
459 Pulverization was done by cryomill (Retsch) at 15 Hz for 15 minutes. The thawed cell lysates  
460 were quantified by NanoDrop and 200μL of lysates with RNA concentration ranging from 80μg  
461 to 500μg were used. For overall polysome quantification, lysates were loaded to 10%-55%  
462 linear sucrose gradients (20mM Tris-HCl pH 8.0, 10mM MgCl<sub>2</sub>, 100mM NH<sub>4</sub>Cl, 300 μM

463 Chloramphenicol) made by GradientMaster (BioComp). The gradients were placed in a SW41Ti  
464 bucket and centrifuged in Optima XE-100 Ultracentrifuge (Beckman Coulter) at 35,000 rpm for 2  
465 hours at 4°C. Gradients were fractionated by BioComp Gradient Fractionator and the absorption  
466 curves at 254nm were recorded by a UV monitor (EM-1, BioRad).

467 Quantification of the polysome profiles was done using customized MATLAB codes. First,  
468 baselines were estimated using the readings where no peaks existed and the background was  
469 subtracted. The background from the free nucleotides and tRNA was removed by fitting an  
470 exponential decay function to the first peak representing the source of non-ribosome signals.  
471 Each ribosome peak was picked and quantified by integrating the area underneath the curve.  
472 To quantify different species of ribosomes in the 70S peak, 100mM NH<sub>4</sub>Cl was replaced with  
473 170mM KCl. Cell lysates were loaded onto 10%-30% linear gradient and centrifuged at 35,000  
474 rpm at 4°C for 5 h. Because the two peaks for the free and mRNA-bound 70S ribosomes are  
475 very close in mass and clean separation was not possible, the MATLAB file-exchange package,  
476 *peakfit*, was used to fit the two overlapped peaks as two Gaussian distributions. For the free  
477 ribosome control, cells were treated with 100μM puromycin for 5 minutes and collected. For  
478 serine hydroxamate (SHX, Sigma S4503) treatment, cells were grown in MOPS glucose  
479 minimal media until OD ~0.3 and treated with SHX with final concentration of 1 mg/mL for ten  
480 minutes before collection.

481

#### 482 lacZ induction and translational elongation rate measurement

483 The method was adapted from Zhu et al<sup>47</sup>. A final concentration of 5 mM IPTG (I2481C-25,  
484 Gold Biotechnology) was added to cultures. At every 15 seconds, 1 mL of culture was collected  
485 in a tube containing 10μL 100mM chloramphenicol, snap frozen in liquid nitrogen and stored at -  
486 20°C before subsequent measurement. After cells were thawed, 400μL of the sample was  
487 added to 100 μL 5x Z-buffer (0.3M Na<sub>2</sub>HPO<sub>4</sub>·7H<sub>2</sub>O, 0.2M NaH<sub>2</sub>PO<sub>4</sub>·H<sub>2</sub>O, 50mM KCl, 5mM  
488 MgSO<sub>4</sub>, 20mM β-mercaptoethanol) and incubated at 37°C for 10 minutes. 100μL of 4mg/mL  
489 MUG (337210010, ACROS Organics) in DMSO was then added to each sample every 10  
490 seconds to accurately control the reaction time. The samples were incubated at 37°C in a  
491 thermomixer at 1,400 rpm mixing rate for 30 minutes to 2 hours, depending on the enzyme  
492 expression level. The reaction was stopped by addition of 300μL of 1M Na<sub>2</sub>CO<sub>3</sub>. The tubes were  
493 spun down at 16,000 X g for 3 minutes to sediment the cell debris. 200 μL of supernatant were  
494 taken and measured fluorescence by a microplate reader (365 nm excitation and 450 nm  
495 emission filter).

496 To infer translational elongation rate, the square root of the signal in excess of the signal at  
497 time zero was plotted. A linear fit was performed on the points after signal began to increase.  
498 The lag time is the x-intercept of the line. A previous study has shown that the initiation time  
499 remains constant for about 10 seconds across a wide range of conditions tested<sup>47</sup>. Therefore,  
500 we corrected the elongation times measured by subtracting 10 seconds in the lag times  
501 measured.

502

#### 503 Ribosome footprinting and total RNA extraction for RNA-Seq

504 The cell collection step was the same as for polysome profiling except that 1mM  
505 chloramphenicol was used in the sucrose solution. The footprinting and library preparation steps  
506 were adapted from Li *et al.*<sup>2</sup> After quantification of RNA concentration with NanoDrop, samples  
507 with 500μg RNA were digested with 750U MNase (10107921001, Roche) for 1 hour at 25°C  
508 before being quenched with 6mM EGTA. The lysates were then layered onto a 10%-55%  
509 sucrose gradient and centrifuged. The monosome fraction was collected and snap frozen in  
510 liquid nitrogen. No polysome peaks were observed, indicating a thorough digestion. The RNA  
511 was isolated using hot phenol and size selected on 15% TBE-Urea PAGE gels run for 1 hour at  
512 210V. Gels were stained with SYBR Gold and visualized using Dark Reader (Clare Chemical  
513 Research). RNA fragments with size between 25-40 nt were extracted using isopropanol



514 precipitation. Total RNA was extracted with TRIZOL from the same pulverized cells used for  
515 footprinting. After DNaseI (04716728001, Roche) treatment and cleanup using RNA clean &  
516 concentrator 5 (R1016, Zymo Research), ribosomal RNA was subtracted using MicrobeExpress  
517 (AM1905, Ambion). The recovered RNA was fragmented and size selected. RNA fragments  
518 with size between 25-40nt were extracted using isopropanol precipitation.

519

#### 520 Library preparation and sequencing

521 Fragments from footprints and total RNA were dephosphorylated at the 3' end by PNK  
522 (M0201, NEB). The repaired fragments were linked to the Universal miRNA Cloning Linker  
523 (S1315S, NEB), reverse transcribed (18080044, Thermo) and circularized (CL4111K, Epicentre).  
524 The circularized samples were PCR amplified (M0531L, NEB) and size selected. High quality  
525 PCR samples checked by Bioanalyzer high sensitive DNA chip. Deep sequencing was done by  
526 Illumina HiSeq 2500 on Rapid flowcells with settings of single end and 75 nt-long read length.

527

#### 528 Mapping and sequencing data analysis

529 Data manipulation including barcode splitting, linker trimming and mapping were done  
530 using Galaxy. The processed reads were mapped to *Escherichia coli* genome  
531 *escherichia\_coli\_k12\_nc\_000913\_3* from the NCBI database with the BWA short read mapping  
532 algorithm. Only the reads between 20-45 nt that aligned to the coding region were used for  
533 further analysis.

534 To infer the ribosome A-site position, python package Plastid<sup>48</sup> was used to align the 3' end  
535 of reads to the stop and start codons<sup>49</sup>, which are known to have higher ribosome densities. We  
536 found that the offsets were 12 nt for stop codon and 15 nt for start codon. Therefore, we used  
537 11nt for A site position and 14nt for P site. The counts were normalized to the total counts in the  
538 coding region as reads per million (RPM) and transcripts per million (TPM). Further analysis  
539 was done using customized Python and R codes with packages including Plastid, dplyr, tidyr  
540 and ggplot2.

541

#### 542 Analysis of ribosome profiling data

543 Transcripts per million (TPM) was used to identify highly expressed genes for codon  
544 occupancy analysis. After assigning each mapped read to the A-site nucleotide, the raw counts  
545 were first normalized by the length of their mapped coding region, to yield count density for each  
546 gene. These count densities were then globally normalized to one million counts across all  
547 genes within one sample. To determine codon occupancy, transcripts having total counts over  
548 100 TPM and containing more than 200 codons were considered. Ribosome footprint counts for  
549 the first and last 40 codons were removed to avoid possible effects from initiation and  
550 termination, and counts per codon were recorded for the remaining counts. For each gene and  
551 each codon type, the codon occupancy ratio is defined as the ratio of measured counts to  
552 expected counts. Expected counts are simply proportional to the frequency of that particular  
553 codon in the gene. The final reported codon occupancy ratio is the average of codon occupancy  
554 ratios from all genes considered weighted equally.

555 We calculated ribosome counts along a transcript using reads per million (RPM). Only  
556 transcripts having total counts over 10 TPM and containing more than 100 codons were  
557 considered. Total counts after filtering were normalized to one million reads. The selected genes  
558 account for more than 85% of the total counts. The ribosome counts are the sum of RPM at  
559 each position.

560 To do the first and second halves comparison of ribosome counts of genes, the same set  
561 of genes and trimming processing for codon occupancy were used. The RPM from positions  
562 were summed up based on its assigned location (first or second half) on the transcript and plot  
563 against each other.

564

565 Code availability

566 All the codes used for data analysis in this paper are available upon request.

567 Data availability

568 All the data used to reach the conclusion of this paper will be made available upon publication  
569 on SRA BioProject with submission number [SUB3256640](#).
